# Supplementary material
Source: HighWire-hosted journal article supplement (https://bmjopen.bmj.com/content/11/3/e047118)
Supplement: inline-supplementary-material-3 [file inline-supplementary-material-3.pdf]

**Supplementary file 3****Search strategy to be conducted in CINAHL**

((((MH "Midwifery+") OR (MH "Students, Nurse Midwifery") OR (MH "Students, Midwifery") OR (MH "Lay Midwifery") OR (MH "Research, Midwifery") OR (MH "Nurse-Midwifery Service") OR (MH "Nurse Midwifery") OR (MH "Midwifery Service+")) AND ((MH "Professional Knowledge+") OR (MH "Clinical Competence+") OR (MH "Professional Competence+") OR (MH "Competency Assessment") OR (MH "Competency Assessment") OR (MH "Education, Competency-Based") OR (MH "Teaching Methods+/EV") OR (MH "Critical Thinking/EV")) AND (impact OR evaluation OR tools OR measuring OR exam\* OR test\* OR impact\*)) OR (MH "Education, Midwifery" AND (evaluation OR impact OR tools OR testing OR exam\* OR competen\* OR "critical thinking")) )
