# Supplementary material
Source: HighWire-hosted journal article supplement (https://bmjopen.bmj.com/content/11/3/e047118)
Supplement: inline-supplementary-material-4 [file inline-supplementary-material-4.pdf]

Supplementary file 4

Data extraction form

| Ref. ID | First Author | Year of Publication | Year(s) of Study Coverage | Study Design | Country | Study location | Study setting | Education area of focus | Cadres trained | On-site | Off-site | Online | Lectures | Simulation | Mentorship | Training Facilitator | Identifiable training materials |  |
|---------|--------------|---------------------|---------------------------|--------------|---------|----------------|---------------|-------------------------|----------------|---------|----------|--------|----------|------------|------------|----------------------|---------------------------------|--|
|         |              |                     |                           |              |         |                |               |                         |                |         |          |        |          |            |            |                      |                                 |  |
|         |              |                     |                           |              |         |                |               |                         |                |         |          |        |          |            |            |                      |                                 |  |
|         |              |                     |                           |              |         |                |               |                         |                |         |          |        |          |            |            |                      |                                 |  |
|         |              |                     |                           |              |         |                |               |                         |                |         |          |        |          |            |            |                      |                                 |  |
|         |              |                     |                           |              |         |                |               |                         |                |         |          |        |          |            |            |                      |                                 |  |
|         |              |                     |                           |              |         |                |               |                         |                |         |          |        |          |            |            |                      |                                 |  |
|         |              |                     |                           |              |         |                |               |                         |                |         |          |        |          |            |            |                      |                                 |  |
|         |              |                     |                           |              |         |                |               |                         |                |         |          |        |          |            |            |                      |                                 |  |
|         |              |                     |                           |              |         |                |               |                         |                |         |          |        |          |            |            |                      |                                 |  |
|         |              |                     |                           |              |         |                |               |                         |                |         |          |        |          |            |            |                      |                                 |  |
