# Supplementary material
Source: HighWire-hosted journal article supplement (https://bmjopen.bmj.com/content/11/3/e047118)
Supplement: inline-supplementary-material-5 [file inline-supplementary-material-5.pdf]

## Supplementary file 5

## Tools to map education and training material content to ICM Competencies for Midwifery Practice and Lancet Series Quality Maternal and Newborn Care framework

Data collection tool: Mapping to ICM Essential Competencies for Midwifery Practice

|                                                                                       |                                                                                                                                                                                                                                    |  |  |  |  |  |  |  |  |
|---------------------------------------------------------------------------------------|------------------------------------------------------------------------------------------------------------------------------------------------------------------------------------------------------------------------------------|--|--|--|--|--|--|--|--|
| Reference ID                                                                          |                                                                                                                                                                                                                                    |  |  |  |  |  |  |  |  |
| First author                                                                          |                                                                                                                                                                                                                                    |  |  |  |  |  |  |  |  |
| Year of publication                                                                   |                                                                                                                                                                                                                                    |  |  |  |  |  |  |  |  |
| Identified training resource                                                          |                                                                                                                                                                                                                                    |  |  |  |  |  |  |  |  |
| Category 1: General Competencies                                                      |                                                                                                                                                                                                                                    |  |  |  |  |  |  |  |  |
| 1a: Assume responsibility for own decisions and actions as an autonomous practitioner |                                                                                                                                                                                                                                    |  |  |  |  |  |  |  |  |
| Knowledge                                                                             | Principles of accountability and transparency                                                                                                                                                                                      |  |  |  |  |  |  |  |  |
|                                                                                       | Principles and concepts of autonomy                                                                                                                                                                                                |  |  |  |  |  |  |  |  |
|                                                                                       | Principles of self-assessment and reflective practice                                                                                                                                                                              |  |  |  |  |  |  |  |  |
|                                                                                       | Personal beliefs and their influence on practice                                                                                                                                                                                   |  |  |  |  |  |  |  |  |
|                                                                                       | Knowledge of evidence-based practices                                                                                                                                                                                              |  |  |  |  |  |  |  |  |
| Skills and Behaviours                                                                 | Demonstrate behaviour that upholds the public trust in the profession                                                                                                                                                              |  |  |  |  |  |  |  |  |
|                                                                                       | Participate in self-evaluation, peer review and other quality improvement activities                                                                                                                                               |  |  |  |  |  |  |  |  |
|                                                                                       | Balance the responsibility of the midwife to provide best care with the autonomy of the woman to make her own decisions                                                                                                            |  |  |  |  |  |  |  |  |
|                                                                                       | Explain the midwife's role in providing care that is based on relevant laws, ethics and evidence.                                                                                                                                  |  |  |  |  |  |  |  |  |
| 1b: Assume responsibility for self-care and self-development as a midwife             |                                                                                                                                                                                                                                    |  |  |  |  |  |  |  |  |
| Knowledge                                                                             | Strategies for managing personal safety particularly within the facility or community setting                                                                                                                                      |  |  |  |  |  |  |  |  |
| Skills and behaviours                                                                 | Display skills in management of self in relation to time management, uncertainty, change and coping with stress                                                                                                                    |  |  |  |  |  |  |  |  |
|                                                                                       | Assume responsibility for personal safety in various practice settings                                                                                                                                                             |  |  |  |  |  |  |  |  |
|                                                                                       | Maintain up-to-date skills and knowledge concerning protocols, guidelines and safe practice                                                                                                                                        |  |  |  |  |  |  |  |  |
|                                                                                       | Remain current in practice by participating in continuing professional education for example, participating in learning opportunities that apply evidence to practice to improve care such as mortality reviews or policy reviews) |  |  |  |  |  |  |  |  |
|                                                                                       | Identify and address limitations in personal skill, knowledge, or experience                                                                                                                                                       |  |  |  |  |  |  |  |  |
|                                                                                       | Promote the profession of midwifery, including participation in professional organizations at the local and national level                                                                                                         |  |  |  |  |  |  |  |  |
| 1c: Appropriately delegate aspects of care and provide supervision                    |                                                                                                                                                                                                                                    |  |  |  |  |  |  |  |  |
| Knowledge                                                                             | Policies and regulation related to delegation                                                                                                                                                                                      |  |  |  |  |  |  |  |  |
|                                                                                       | Supportive strategies to supervise others                                                                                                                                                                                          |  |  |  |  |  |  |  |  |
|                                                                                       | Role of midwives as preceptors, mentors, supervisors, and role models                                                                                                                                                              |  |  |  |  |  |  |  |  |
| Skills and behaviours                                                                 | Provide supervision to ensure that practice is aligned with evidence-based clinical practice guidelines                                                                                                                            |  |  |  |  |  |  |  |  |
|                                                                                       | Support the profession's growth through participation in midwifery education in the roles of clinical preceptor, mentor, and role model                                                                                            |  |  |  |  |  |  |  |  |
| 1d: Use research to inform practice                                                   |                                                                                                                                                                                                                                    |  |  |  |  |  |  |  |  |
| Knowledge                                                                             | Principles of research and evidence-based practice                                                                                                                                                                                 |  |  |  |  |  |  |  |  |
|                                                                                       | Epidemiologic concepts relevant to maternal and infant health                                                                                                                                                                      |  |  |  |  |  |  |  |  |
|                                                                                       | Global recommendations for practice and their evidence base (e.g. World Health Organization guidelines)                                                                                                                            |  |  |  |  |  |  |  |  |
| Skills and behaviours                                                                 | Discuss research findings with women and colleagues                                                                                                                                                                                |  |  |  |  |  |  |  |  |

## Supplementary file 5

## Tools to map education and training material content to ICM Competencies for Midwifery Practice and Lancet Series Quality Maternal and Newborn Care framework

|                                                                                                                               |                                                                                                                              |  |  |  |  |  |  |  |  |
|-------------------------------------------------------------------------------------------------------------------------------|------------------------------------------------------------------------------------------------------------------------------|--|--|--|--|--|--|--|--|
|                                                                                                                               | Support research in midwifery by participating in the conduct of research                                                    |  |  |  |  |  |  |  |  |
| <b>1e: Uphold fundamental human rights of individuals when providing midwifery care</b>                                       |                                                                                                                              |  |  |  |  |  |  |  |  |
| Knowledge                                                                                                                     | Laws and/or codes that protect human rights                                                                                  |  |  |  |  |  |  |  |  |
|                                                                                                                               | Sexual, reproductive health rights of women and girls                                                                        |  |  |  |  |  |  |  |  |
|                                                                                                                               | Development of gender identity and sexual orientation                                                                        |  |  |  |  |  |  |  |  |
|                                                                                                                               | Principles of ethics and Human Rights within midwifery practice                                                              |  |  |  |  |  |  |  |  |
| Skills and behaviours                                                                                                         | Provide information to women about their sexual and reproductive health rights                                               |  |  |  |  |  |  |  |  |
|                                                                                                                               | Inform women about the scope of midwifery practice and women's rights and responsibilities                                   |  |  |  |  |  |  |  |  |
|                                                                                                                               | Provide information and support to individuals in complex situations where there are competing ethical principles and rights |  |  |  |  |  |  |  |  |
|                                                                                                                               | Practice in accordance with philosophy and code of ethics of the ICM and national standards for health professionals         |  |  |  |  |  |  |  |  |
|                                                                                                                               | Provide gender sensitive care                                                                                                |  |  |  |  |  |  |  |  |
| <b>1f: Adhere to jurisdictional laws, regulatory requirements, and codes of conduct for midwifery practice.</b>               |                                                                                                                              |  |  |  |  |  |  |  |  |
| Knowledge                                                                                                                     | The laws and regulations of the jurisdiction regarding midwifery                                                             |  |  |  |  |  |  |  |  |
|                                                                                                                               | National/state/local community standards of midwifery practice                                                               |  |  |  |  |  |  |  |  |
|                                                                                                                               | Ethical principles                                                                                                           |  |  |  |  |  |  |  |  |
|                                                                                                                               | ICM and other midwifery philosophies, values, codes of ethics                                                                |  |  |  |  |  |  |  |  |
| Skills and behaviours                                                                                                         | Practise according to legal requirements and ethical principles                                                              |  |  |  |  |  |  |  |  |
|                                                                                                                               | Meet requirements for maintenance of midwifery registration                                                                  |  |  |  |  |  |  |  |  |
|                                                                                                                               | Protect confidentiality of oral information and written records about care of women and infants                              |  |  |  |  |  |  |  |  |
|                                                                                                                               | Maintain records of care in the manner required by the health authority                                                      |  |  |  |  |  |  |  |  |
|                                                                                                                               | Comply with all local reporting regulations for birth and death registration                                                 |  |  |  |  |  |  |  |  |
|                                                                                                                               | Recognize violations of laws, regulations, and ethical codes and take appropriate action                                     |  |  |  |  |  |  |  |  |
|                                                                                                                               | Report and document incidents and adverse outcomes as required while providing care                                          |  |  |  |  |  |  |  |  |
| <b>1g: Facilitate women to make individual choices about care</b>                                                             |                                                                                                                              |  |  |  |  |  |  |  |  |
| Knowledge                                                                                                                     | Cultural norms and practices surrounding sexuality, sexual practices, marriage, the childbearing continuum, and parenting    |  |  |  |  |  |  |  |  |
|                                                                                                                               | Principles of empowerment                                                                                                    |  |  |  |  |  |  |  |  |
|                                                                                                                               | Methods of conveying health information to individuals, groups, communities                                                  |  |  |  |  |  |  |  |  |
| Skills and behaviours                                                                                                         | Advocate for and support women to be the central decision makers in their care                                               |  |  |  |  |  |  |  |  |
|                                                                                                                               | Assist women to identify their needs, knowledge, skills, feelings, and preferences throughout the course of care             |  |  |  |  |  |  |  |  |
|                                                                                                                               | Provide information and anticipatory guidance about sexual and reproductive health to assist women's decision making         |  |  |  |  |  |  |  |  |
|                                                                                                                               | Collaborate with women in developing a comprehensive plan of care that respects her preferences and decisions                |  |  |  |  |  |  |  |  |
| <b>1h: Demonstrate effective interpersonal communication with women and families, health care teams, and community groups</b> |                                                                                                                              |  |  |  |  |  |  |  |  |
| Knowledge                                                                                                                     | Role and responsibilities of midwives and other maternal – infant health providers                                           |  |  |  |  |  |  |  |  |
|                                                                                                                               | Principles of effective communication                                                                                        |  |  |  |  |  |  |  |  |
|                                                                                                                               | Principles of effectively working in health care teams                                                                       |  |  |  |  |  |  |  |  |
|                                                                                                                               | Cultural practices and beliefs related to childbearing and reproductive health                                               |  |  |  |  |  |  |  |  |
|                                                                                                                               | Principles of communication in crisis situations, e.g. grief and loss, emergencies                                           |  |  |  |  |  |  |  |  |
| Skills and behaviours                                                                                                         | Listen to others in an unbiased and empathetic manner                                                                        |  |  |  |  |  |  |  |  |



## Supplementary file 5

## Tools to map education and training material content to ICM Competencies for Midwifery

## Practice and Lancet Series Quality Maternal and Newborn Care framework

|                                                                                                       |                                                                                                                                             |  |  |  |  |  |  |  |  |
|-------------------------------------------------------------------------------------------------------|---------------------------------------------------------------------------------------------------------------------------------------------|--|--|--|--|--|--|--|--|
|                                                                                                       | Include woman in decision-making about referral to other providers and services                                                             |  |  |  |  |  |  |  |  |
| <b>1l: Recognise abnormalities and complications and institute appropriate treatment and referral</b> |                                                                                                                                             |  |  |  |  |  |  |  |  |
| Knowledge                                                                                             | Complications/pathologic conditions related to health status                                                                                |  |  |  |  |  |  |  |  |
|                                                                                                       | Emergency interventions/life-saving therapies                                                                                               |  |  |  |  |  |  |  |  |
|                                                                                                       | Limits of midwifery scope of practice and own experience                                                                                    |  |  |  |  |  |  |  |  |
|                                                                                                       | Available referral systems to access medical and other personnel to manage complications                                                    |  |  |  |  |  |  |  |  |
|                                                                                                       | Community/facility plans and protocols for accessing resources in timely manner                                                             |  |  |  |  |  |  |  |  |
| Skills and behaviours                                                                                 | Maintain up-to-date knowledge, life-saving skills, and equipment for responding to emergency situations                                     |  |  |  |  |  |  |  |  |
|                                                                                                       | Recognize situations requiring expertise beyond midwifery care                                                                              |  |  |  |  |  |  |  |  |
|                                                                                                       | Maintain communication with women about nature of problem, actions taken, and referral if indicated                                         |  |  |  |  |  |  |  |  |
|                                                                                                       | Determine the need for immediate intervention and respond appropriately                                                                     |  |  |  |  |  |  |  |  |
|                                                                                                       | Implement timely and appropriate intervention, inter-professional consultation and/or timely referral taking account of local circumstances |  |  |  |  |  |  |  |  |
|                                                                                                       | Provide accurate oral and written information to other care providers when referral is made                                                 |  |  |  |  |  |  |  |  |
|                                                                                                       | Collaborate with decision-making if possible and appropriate                                                                                |  |  |  |  |  |  |  |  |
| <b>1m: Care for women who experience physical and sexual violence and abuse</b>                       |                                                                                                                                             |  |  |  |  |  |  |  |  |
| Knowledge                                                                                             | Socio-cultural, behavioural, and economic conditions that often accompany violence and abuse                                                |  |  |  |  |  |  |  |  |
|                                                                                                       | Resources in community to assist women and children                                                                                         |  |  |  |  |  |  |  |  |
|                                                                                                       | Risks of disclosure                                                                                                                         |  |  |  |  |  |  |  |  |
| Skills and behaviours                                                                                 | Protect privacy and confidentiality                                                                                                         |  |  |  |  |  |  |  |  |
|                                                                                                       | Provide information to all women about sources of help regardless of whether there is disclosure about violence                             |  |  |  |  |  |  |  |  |
|                                                                                                       | Inquire routinely about safety at home, at work                                                                                             |  |  |  |  |  |  |  |  |
|                                                                                                       | Recognize potential signs of abuse from physical appearance, emotional affect, related risk behaviours such as substance abuse              |  |  |  |  |  |  |  |  |
|                                                                                                       | Provide special support for adolescents and victims of gender-based violence including rape                                                 |  |  |  |  |  |  |  |  |
|                                                                                                       | Refer to community resources, assist in locating safe setting as needed                                                                     |  |  |  |  |  |  |  |  |
| <b>Category 3: Care during labour and birth</b>                                                       |                                                                                                                                             |  |  |  |  |  |  |  |  |
| <b>3a: Promote physiological labour and birth</b>                                                     |                                                                                                                                             |  |  |  |  |  |  |  |  |
| Knowledge                                                                                             | Anatomy of maternal pelvis and fetus; mechanisms of labour for different fetal presentations                                                |  |  |  |  |  |  |  |  |
|                                                                                                       | Physiologic onset and progression of labour                                                                                                 |  |  |  |  |  |  |  |  |
|                                                                                                       | Evidence informed intrapartum care policies and guidelines, including avoidance of routine interventions in normal labour and birth         |  |  |  |  |  |  |  |  |
|                                                                                                       | Cultural and social beliefs and traditions about birth                                                                                      |  |  |  |  |  |  |  |  |
|                                                                                                       | Signs and behaviours of labour progress; factors that impede labour progress                                                                |  |  |  |  |  |  |  |  |
|                                                                                                       | Methods of assessing fetus during labour                                                                                                    |  |  |  |  |  |  |  |  |
| Skills and behaviours                                                                                 | Provide care for a woman in the birth setting of her choice, following policies and protocols                                               |  |  |  |  |  |  |  |  |
|                                                                                                       | Obtain relevant obstetric and medical history                                                                                               |  |  |  |  |  |  |  |  |
|                                                                                                       | Perform and interpret focused physical examination of the woman and fetus                                                                   |  |  |  |  |  |  |  |  |
|                                                                                                       | Order and interpret laboratory tests if needed                                                                                              |  |  |  |  |  |  |  |  |
|                                                                                                       | Assess woman's physical and behavioural responses to labour                                                                                 |  |  |  |  |  |  |  |  |
|                                                                                                       | Provide information, support, and encouragement to woman and support persons throughout labour and birth                                    |  |  |  |  |  |  |  |  |

## Supplementary file 5

## Tools to map education and training material content to ICM Competencies for Midwifery

## Practice and Lancet Series Quality Maternal and Newborn Care framework

|                                                                                                 |                                                                                                                                                                                  |  |  |  |  |  |  |  |  |
|-------------------------------------------------------------------------------------------------|----------------------------------------------------------------------------------------------------------------------------------------------------------------------------------|--|--|--|--|--|--|--|--|
|                                                                                                 | Provide respectful one-to-one care                                                                                                                                               |  |  |  |  |  |  |  |  |
|                                                                                                 | Encourage freedom of movement and upright positions                                                                                                                              |  |  |  |  |  |  |  |  |
|                                                                                                 | Provide nourishment and fluids                                                                                                                                                   |  |  |  |  |  |  |  |  |
|                                                                                                 | Offer and support woman to use strategies for coping with labour pain, e.g. controlled breathing, water immersion, relaxation, massage, and pharmacologic modalities when needed |  |  |  |  |  |  |  |  |
|                                                                                                 | Assess regularly parameters of maternal-fetal status, and e.g. vital signs, contractions, cervical changes, and fetal descent                                                    |  |  |  |  |  |  |  |  |
|                                                                                                 | Use labour progress graphic display to record findings and assist in detecting complications, e.g. labour delay, fetal compromise, maternal exhaustion, hypertension, infection  |  |  |  |  |  |  |  |  |
|                                                                                                 | Augment uterine contractility judiciously using non-pharmacological or pharmacological agents to prevent non-progressive labour                                                  |  |  |  |  |  |  |  |  |
|                                                                                                 | Prevent unnecessary routine interventions, e.g. amniotomy, electronic fetal monitoring, directed closed glottis pushing, episiotomy                                              |  |  |  |  |  |  |  |  |
| <b>3b: Manage a safe spontaneous vaginal birth; prevent, detect and stabilize complications</b> |                                                                                                                                                                                  |  |  |  |  |  |  |  |  |
| Knowledge                                                                                       | Manage a safe spontaneous vaginal birth                                                                                                                                          |  |  |  |  |  |  |  |  |
|                                                                                                 | Evidence about conduct of third stage, including use of uterotonics                                                                                                              |  |  |  |  |  |  |  |  |
|                                                                                                 | Potential complications and their immediate treatment e.g. shoulder dystocia, and excessive bleeding, fetal compromise, eclampsia, retained placenta                             |  |  |  |  |  |  |  |  |
|                                                                                                 | Management of emergencies as covered in emergency skills training programmes such as BEmONC, HMS                                                                                 |  |  |  |  |  |  |  |  |
|                                                                                                 | Signs of placental separation; appearance of normal placenta, membranes, and umbilical cord                                                                                      |  |  |  |  |  |  |  |  |
|                                                                                                 | Types of perineal and vaginal trauma requiring repair and suturing techniques                                                                                                    |  |  |  |  |  |  |  |  |
| Skills and behaviours                                                                           | Support the woman to give birth in her position of choice                                                                                                                        |  |  |  |  |  |  |  |  |
|                                                                                                 | Ensure clean environment, presence of clean necessary supplies and source of warmth                                                                                              |  |  |  |  |  |  |  |  |
|                                                                                                 | Coach woman about pushing to control expulsion of presenting part, avoid routine episiotomy                                                                                      |  |  |  |  |  |  |  |  |
|                                                                                                 | Undertake appropriate manoeuvres and use maternal position to facilitate vertex, face, or breech birth                                                                           |  |  |  |  |  |  |  |  |
|                                                                                                 | Expedite birth in presence of fetal distress                                                                                                                                     |  |  |  |  |  |  |  |  |
|                                                                                                 | Delay cord clamping                                                                                                                                                              |  |  |  |  |  |  |  |  |
|                                                                                                 | Manage nuchal cord                                                                                                                                                               |  |  |  |  |  |  |  |  |
|                                                                                                 | Assess immediate condition of newborn                                                                                                                                            |  |  |  |  |  |  |  |  |
|                                                                                                 | Provide skin to skin contact and warm environment                                                                                                                                |  |  |  |  |  |  |  |  |
|                                                                                                 | Deliver placenta and membranes and inspect for completeness                                                                                                                      |  |  |  |  |  |  |  |  |
|                                                                                                 | Assess uterine tone, maintain firm contraction, and estimate and record maternal blood loss; manage excessive blood loss including administration of uterotonics                 |  |  |  |  |  |  |  |  |
|                                                                                                 | Inspect vaginal and perineal areas for trauma, and repair as needed, following policies and protocols                                                                            |  |  |  |  |  |  |  |  |
|                                                                                                 | Provide first line measures to treat or stabilise identified conditions                                                                                                          |  |  |  |  |  |  |  |  |
|                                                                                                 | Refer for continuing treatment of any complications as needed                                                                                                                    |  |  |  |  |  |  |  |  |
| <b>3c: Provide care of the newborn immediately after birth</b>                                  |                                                                                                                                                                                  |  |  |  |  |  |  |  |  |
| Knowledge                                                                                       | Normal transition to extra-uterine environment                                                                                                                                   |  |  |  |  |  |  |  |  |
|                                                                                                 | Scoring systems to assess newborn status                                                                                                                                         |  |  |  |  |  |  |  |  |

## Supplementary file 5

## Tools to map education and training material content to ICM Competencies for Midwifery Practice and Lancet Series Quality Maternal and Newborn Care framework

|                      |                                                                                                                                                                                                   |  |  |  |  |  |  |  |  |
|----------------------|---------------------------------------------------------------------------------------------------------------------------------------------------------------------------------------------------|--|--|--|--|--|--|--|--|
|                      | Signs indicating need for immediate actions to assist transition                                                                                                                                  |  |  |  |  |  |  |  |  |
|                      | Interventions to establish breathing and circulation as covered in training programs such as HBS                                                                                                  |  |  |  |  |  |  |  |  |
|                      | Appearance and behaviour of healthy newborn infant                                                                                                                                                |  |  |  |  |  |  |  |  |
|                      | Method of assessing gestational age of newborn infant                                                                                                                                             |  |  |  |  |  |  |  |  |
|                      | Needs of small for gestational age and low birth weight infants                                                                                                                                   |  |  |  |  |  |  |  |  |
| Skills and behaviour | Use standardized method to assess newborn condition in the first minutes of life (Apgar or other); refer if needed                                                                                |  |  |  |  |  |  |  |  |
|                      | Institute actions to establish and support breathing and oxygenation, refer for continuing treatment as needed                                                                                    |  |  |  |  |  |  |  |  |
|                      | Provide a safe warm environment for initiating breastfeeding and attachment (bonding) in the first hour of life                                                                                   |  |  |  |  |  |  |  |  |
|                      | Conduct a complete physical examination of newborn in presence of mother/family; explain findings and expected changes e.g. colour of extremities, moulding of head. Refer for abnormal findings. |  |  |  |  |  |  |  |  |
|                      | Institute newborn prophylaxis e.g. ophthalmic infection, and hemorrhagic disease, according to policies and guidelines                                                                            |  |  |  |  |  |  |  |  |
|                      | Promote care by mother, frequent feeding and close observation                                                                                                                                    |  |  |  |  |  |  |  |  |
|                      | Involve partner/support persons in providing newborn care                                                                                                                                         |  |  |  |  |  |  |  |  |

## Supplementary file 5

## Tools to map education and training material content to ICM Competencies for Midwifery

## Practice and Lancet Series Quality Maternal and Newborn Care framework

Data collection tool: Mapping to Lancet Series Quality Maternal and Newborn Care framework

|                                                                                                      |                                                                                                    |  |  |  |  |  |  |  |
|------------------------------------------------------------------------------------------------------|----------------------------------------------------------------------------------------------------|--|--|--|--|--|--|--|
| Reference ID                                                                                         |                                                                                                    |  |  |  |  |  |  |  |
| First author                                                                                         |                                                                                                    |  |  |  |  |  |  |  |
| Year of publication                                                                                  |                                                                                                    |  |  |  |  |  |  |  |
| Identified training resource                                                                         |                                                                                                    |  |  |  |  |  |  |  |
| <b>Practice Categories</b>                                                                           |                                                                                                    |  |  |  |  |  |  |  |
| For all childbearing women and infants                                                               | Education                                                                                          |  |  |  |  |  |  |  |
|                                                                                                      | Information                                                                                        |  |  |  |  |  |  |  |
|                                                                                                      | Health Promotion                                                                                   |  |  |  |  |  |  |  |
|                                                                                                      | Assessment                                                                                         |  |  |  |  |  |  |  |
|                                                                                                      | Screening                                                                                          |  |  |  |  |  |  |  |
|                                                                                                      | Care planning                                                                                      |  |  |  |  |  |  |  |
|                                                                                                      | Promotion of normal processes, prevention of complications                                         |  |  |  |  |  |  |  |
| For childbearing women and infants with complications                                                | First line management of complications                                                             |  |  |  |  |  |  |  |
|                                                                                                      | Medical obstetric neonatal services                                                                |  |  |  |  |  |  |  |
| <b>Organisation of care</b>                                                                          |                                                                                                    |  |  |  |  |  |  |  |
| For all childbearing women and infants AND for all childbearing women and infants with complications | Available                                                                                          |  |  |  |  |  |  |  |
|                                                                                                      | Accessible                                                                                         |  |  |  |  |  |  |  |
|                                                                                                      | Acceptable                                                                                         |  |  |  |  |  |  |  |
|                                                                                                      | Good quality services                                                                              |  |  |  |  |  |  |  |
|                                                                                                      | Adequate resources                                                                                 |  |  |  |  |  |  |  |
|                                                                                                      | Competent workforce                                                                                |  |  |  |  |  |  |  |
|                                                                                                      | Continuity                                                                                         |  |  |  |  |  |  |  |
|                                                                                                      | Services integrated across community and facilities                                                |  |  |  |  |  |  |  |
| <b>Values</b>                                                                                        |                                                                                                    |  |  |  |  |  |  |  |
| For all childbearing women and infants AND for all childbearing women and infants with complications | Respect                                                                                            |  |  |  |  |  |  |  |
|                                                                                                      | Communication                                                                                      |  |  |  |  |  |  |  |
|                                                                                                      | Community knowledge                                                                                |  |  |  |  |  |  |  |
|                                                                                                      | Understanding                                                                                      |  |  |  |  |  |  |  |
|                                                                                                      | Care tailored to women's circumstances and needs                                                   |  |  |  |  |  |  |  |
| <b>Philosophy</b>                                                                                    |                                                                                                    |  |  |  |  |  |  |  |
| For all childbearing women and infants AND for all childbearing women and infants with complications | Optimising biological, psychological, social and cultural processes                                |  |  |  |  |  |  |  |
|                                                                                                      | Strengthening women's capabilities                                                                 |  |  |  |  |  |  |  |
|                                                                                                      | Expectant management, using interventions only when indicated                                      |  |  |  |  |  |  |  |
| <b>Care providers</b>                                                                                |                                                                                                    |  |  |  |  |  |  |  |
| For all childbearing women and infants AND for all childbearing women and infants with complications | Practitioners who combine clinical knowledge and skills with interpersonal and cultural competence |  |  |  |  |  |  |  |
|                                                                                                      | Division of roles and responsibility based on need, competencies and resources                     |  |  |  |  |  |  |  |
